# Supplementary material
Source: publisher site journal article supplement (https://www.dovepress.com/get_supplementary_file.php?f=441790.docx)
Supplement: Supplementary file 1 [file get_supplementary_file.php]

**Supplementary Table 1** Assessment of the responses.

| **Case Report** | **GPT-3.5**  **Primary Diagnosis** | **GPT-3.5 Secondary Diagnosis** | **GPT-4.0**  **Primary Diagnosis** | **GPT-4.0**  **Secondary Diagnosis** |
| --- | --- | --- | --- | --- |
| Case 1: BRAT1-related neurodevelopmental disorder: two cases report and literature review  DOI: 10.3760/cma.j.cmcr.2022.e07341 | 0 | / | 0 | / |
| Case 2: A case of KRAS mutation with RAS-associated autoimmune leukoproliferative disease  DOI: 10.3760/cma.j.cmcr.2022.e07417 | 0 | / | 0 | / |
| Case 3: Autoinflammatory disease caused by RIPK1 variants in a neonate:A case report  DOI: 10.3760/cma.j.cmcr.2022.e01618 | 0 | / | 0 | / |
| Case 4: A case of COPA syndrome complicated with neuromyelitis spectrum disease  DOI: 10.3760/cma.j.cmcr.2023.e01457 | 2 | / | 3 | / |
| Case 5: CTLA-4 haploid deficiency with autoimmune infiltrating disease: a case report  DOI: 10.3760/cma.j.cmcr.2022.e03311 | 0 | / | 1 | / |
| Case 6: A case report on CT dynamic 4D combined with total lower extremity CTV angiography for lower extremity ulcerative venous disease  DOI: 10.3760/cma.j.cmcr.2022.e03692 | 0 | / | 0 | / |
| Case 7: A case of Epstein-Barr virus-related lymphoid tissue proliferative disease  DOI: 10.3760/cma.j.cmcr.2022.e02996 | 0 | / | 0 | / |
| Case 8: IgA nephropathy combined with autoimmune lymphocyte proliferative disease in one case  DOI: 10.3760/cma.j.cmcr.2022.e01960 | 2 | / | 3 | / |
| Case 9: A case of IgG4 related diseases  DOI: 10.3760/cma.j.cmcr.2022.e06340 | 0 | / | 0 | / |
| Case 10: A case of IgG4-related disease complicated with pancreatic pseudocyst pleural leakage and splenic aneurysm  DOI: 10.3760/cma.j.cmcr.2022.e06800 | 1 | 1/3 | 0 | 2/3 |
| Case 11: One case of refractory angina pectoris due to coronary artery involvement in IgG4- related disease  DOI: 10.3760/cma.j.cmcr.2022.e02729 | 0 | / | 0 | / |
| Case 12: A case report: IgG4-related diseases，leading to interstitial pneumonia, extensive arterial strain and myocardial infarction  DOI: 10.3760/cma.j.cmcr.2022.e02237 | 3 | / | 3 | / |
| Case 13: A case of IgG4-related lung disease and literature review  DOI: 10.3760/cma.j.cmcr.2022.e06123 | 0 | / | 0 | / |
| Case 14: IgG4-related disease：A case report  DOI: 10.3760/cma.j.cmcr.2022.e06941 | 1 | / | 3 | / |
| Case 15: A case of IgG4 related disease with ocular and salivary gland involvement  DOI: 10.3760/cma.j.cmcr.2022.e06916 | 0 | / | 2 | / |
| Case 16: A case of IgG4 related disease with mesangial hyperplastic IgA nephropathy  DOI: 10.3760/cma.j.cmcr.2022.e02750 | 0 | / | 1 | / |
| Case 17: A case of IgG4-related disease involving the lung  DOI: 10.3760/cma.j.cmcr.2022.e00801 | 0 | / | 0 | / |
| Case 18: A case report on IgG4-related disease involving coronary artery  DOI: 10.3760/cma.j.cmcr.2022.e06429 | 0 | 2/9 | 3 | 1 |
| Case 19: A case report of IgG4-related disease involving prostate and urethra  DOI: 10.3760/cma.j.cmcr.2022.e06464 | 0 | / | 0 | / |
| Case 20: A case report on T-lymphoproliferative disease (lymphoma) combined with secondary phagocytic syndrome  DOI: 10.3760/cma.j.cmcr.2022.e06972 | 0 | 0 | 0 | 0 |
| Case 21: A case report of central compartment atopic disease  DOI：10.3760/cma.j.cmcr.2022.e05961 | 0 | 1/2 | 1 | 1/2 |
| Case 22: IgG4-related diseases manifesting as Guillain-Barré syndrome  DOI: 10.3760/cma.j.cmcr.2022.e07293 | 0 | 1/2 | 0 | 3/8 |
| Case 23: A case of borderline EBV-associated T/NK lymphoproliferative disease manifested as hypersensitivity to mosquito bites  DOI: 10.3760/cma.j.cmcr.2023.e00799 | 0 | / | 0 | / |
| Case 24: IgG4‑related disease manifested as severe asthma: a case report  DOI: 10.3760/cma.j.cn112147-20220616-00504 | 3 | / | 3 | / |
| Case 25: A case with Ras-associated autoimmune leukoproliferative disorder presenting with crescentic nephritis  DOI: 10.3760/cma.j.cmcr.2022.e06329 | 2 | 0 | 3 | 1 |
| Case 26: Adult Léri-Weill dyschondrosteosis coexists with endocrinal metabolic disorders: a report of two cases  DOI: 10.3760/cma.j.cn311282-20210823-00541 | 0 | / | 0 | / |
| Case 27: Familial interstitial lung disease associated with surfactant protein C gene mutation in adults: report of two cases and literature review  DOI: 10.3760/cma.j.cn112147-20210428-00295 | 3 | / | 3 | / |
| Case 28: Familial interstitial lung disease associated with surfactant protein C gene mutation in adults: report of two cases and literature review  DOI: 10.3760/cma.j.cn112147-20210428-00295 | 2 | / | 2 | / |
| Case 29: Acute pulmonary embolism related to multiple autoimmune diseases: A case report  DOI: 10.3760/cma.j.cmcr.2022.e01003 | 0 | 2/3 | 0 | 2/3 |
| Case 30: A case of MOG-IgG-related disease induced by PD-1 inhibitor in malignant melanoma  DOI: 10.3760/cma.j.cmcr.2022.e01473 | 0 | / | 3 | / |
| Case 31: Subacute combined degeneration of spinal cord with autoimmune disease in children: a case report  DOI: 10.3760/cma.j.cn113694-20220610-00468 | 1 | / | 0 | / |
| Case 32: A case of second-line combination therapy for patients newly diagnosed with autoimmune disease ITP  DOI: 10.3760/cma.j.cmcr.2022.e06971 | 1 | / | 3 | / |
| Case 33: Successful radiotherapy of skin Rosai-Dorfman disease: A case report  DOI: 10.3760/cma.j.cmcr.2022.e06889 | 0 | 1/3 | 3 | 2/3 |
| Case 34: One case of differential diagnosis between varicose veins and adrenal diseases caused by noncirrhotic portal hypertension  DOI: 10.3760/cma.j.cmcr.2022.e06657 | 3 | 2/3 | 3 | 5/6 |
| Case 35: A case report of nonsteroidal anti-inflammatory drug induced colonic diaphragm disease  DOI: 10.3760/cma.j.cmcr.2022.e02423 | 0 | / | 0 | / |
| Case 36: Improvement of renal function after bariatric surgery in an obese patient with end-stage kidney disease  DOI: 10.3760/cma.j.cn112138-20210127-00073 | 3 | 1/3 | 3 | 1/3 |
| Case 37: Case report: Lung cancer combined with multiple tobacco-related diseases  DOI: 10.3760/cma.j.cmcr.2022.e01233 | 1 | 4/5 | 3 | 4/5 |
| Case 38: Experience of prone ventilation in the treatment of patients with CHRONIC obstructive pulmonary disease complicated with ARDS caused by thoracic malformation  DOI: 10.3760/cma.j.cmcr.2022.e02221 | 0 | 1 | 0 | 1 |
| Case 39: A case of general anesthesia for a patient with complex endocrine diseases  DOI: 10.3760/cma.j.cmcr.2022.e02803 | 0 | 4/5 | 0 | 1 |
| Case 40: The Checklist of Abdominal Pain Causes Used in the Differential Diagnosis of Vascular Diseases with Abdominal Pain as a Presentation: an Analysis of Three Cases (Patient 1)  DOI: 10.12114/j.issn.1007-9572.2022.0298 | 1 | / | 2 | / |
| Case 41: The Checklist of Abdominal Pain Causes Used in the Differential Diagnosis of Vascular Diseases with Abdominal Pain as a Presentation: an Analysis of Three Cases (Patient 2)  DOI: 10.12114/j.issn.1007-9572.2022.0298 | 3 | / | 3 | / |
| Case 42: The Checklist of Abdominal Pain Causes Used in the Differential Diagnosis of Vascular Diseases with Abdominal Pain as a Presentation: an Analysis of Three Cases (Patient 2)  DOI: 10.12114/j.issn.1007-9572.2022.0298 | 2 | / | 3 | / |
| Case 43: Vitamin D deficiency osteomalacia caused by liver disease: a case report  DOI: 10.3760/cma.j.cmcr.2023.e01484 | 0 | / | 0 | / |
| Case 44: Sjögren syndrome complicated with pulmonary veno-occlusive disease: a case report  DOI: 10.3760/cma.j.cmcr.2023.e00227 | 1 | 3/5 | 2 | 2/5 |
| Case 45: Early application of budesonide/glycopyrrolate/formoterol fumarate metered dose inhaled administered with a spacer in acute exacerbation of chronic obstructive pulmonary disease: A case report  DOI: 10.3760/cma.j.cmcr.2023.e00468 | 3 | 0 | 3 | 0 |
| Case 46: Coronary microvascular disease with obstructive coronary artery disease: a case report and literature review  DOI: 10.3760/cma.j.cn116031.2022.1000103 | 0 | 1/2 | 0 | 3/4 |
| Case 47: A rare case of CAG repeated extension mutation of HTT and TBP genes  DOI:  10.3760/cma.j.cmcr.2022.e03870 | 3 | 1/2 | 3 | 1 |
| Case 48: Diagnosis and treatment of accelerated atherosclerotic cardiovascular disease: a case report  DOI: 10.3760/cma.j.cmcr.2022.e06233 | 0 | / | 0 | / |
| Case 49: Epstein-Barr virus associated T/NK-cell lymphoproliferative disorders in the buccal mucosa: report of 1 case and review of literature  DOI: 10.3760/cma.j.cn115356-20220211-00035 | 3 | / | 3 | / |
| Case 50: A case report on inflammatory disease of the colon - intestinal leukoencephalopathy  DOI: 10.3760/cma.j.cmcr.2022.e03686 | 3 | / | 3 | / |
| Case 51: Indolent T-cell lymphoproliferative disorder of the gastrointestinal tract with the whole wall involvement: report of a case  DOI: 10.3760/cma.j.cn112151-20220314-00178 | 0 | / | 0 | / |
| Case 52: A case report on ANCA-associated nephritis combined with IgG4-associated disease  DOI: 10.3760/cma.j.issn.1001-7097.2014.12.014 | 2 | / | 1 | / |
| Case 53: Autologous peripheral blood stem cell transplantation combined with bortezomib and dexamethasone for the treatment of light chain proximal tubulopathy: a case report  DOI: 10.3760/cma.j.issn.0253-2727.2019.08.019 | 0 | 0 | 1 | 0 |
| Case 54: A case report on EBV-positive lymphoid tissue proliferative disease  DOI: 10.3760/cma.j.issn.2096-367X.2018.01.018 | 0 | / | 0 | / |
| Case 55: A case report on IgG4-associated disease combined with lymphoma  DOI: 10.3760/cma.j.issn.1007-7480.2014.08.020 | 3 | 1 | 2 | 1 |
| Case 56: A case report on IgG4-related disease involving coronary artery  DOI: 10.3760/cma.j.issn.0376-2491.2019.18.014 | 1 | / | 0 | / |
| Case 57: A case report on IGg4-related disease affecting the orbit  DOI: 10.3760/cma.j.issn.1006-4443.2015.08.028 | 0 | / | 2 | / |
| Case 58: MRI and CT findings of the patient with IgG4-related disease: a case report  DOI: 10.3969/j.issn.1674-8034.2015.03.012 | 0 | / | 0 | / |
| Case 59: Case report on IgG4-associated disease combined with pulmonary corynebacterium striatum infection  DOI: 10.3760/cma.j.cn112147-20210701-00459 | 0 | / | 0 | / |
| Case 60: MOG antibodies-associated autoimmune demyelination disease: a report of three cases and literature review (Patient 1)  DOI: 10.3760/cma.j.issn.1671-8925.2018.05.016 | 3 | / | 3 | / |
| Case 61: MOG antibodies-associated autoimmune demyelination disease: a report of three cases and literature review (Patient 2)  DOI: 10.3760/cma.j.issn.1671-8925.2018.05.016 | 0 | / | 1 | / |
| Case 62: MOG antibodies-associated autoimmune demyelination disease: a report of three cases and literature review (Patient 3)  DOI: 10.3760/cma.j.issn.1671-8925.2018.05.016 | 0 | / | 0 | / |
| Case 63: Cerebral vasculitis in X-linked lymphoproliferative disease in a Chinese patient  DOI: 10.3760/cma.j.cn112140-20200710-00715 | 2 | / | 1 | / |
| Case 64: A case report on recurrent hemorrhagic infection caused by a Pittsburgh mutation in the α1 antitrypsin gene  DOI: 10.3760/cma.j.issn.0578-1310.2015.11.013 | 2 | / | 3 | / |
| Case 65: A case report on IgG4-associated disease with Castleman's disease-like lesions  DOI: 10.3760/cma.j.issn.0529-5807.2014.03.012 | 0 | / | 3 | / |
| Case 66: A case report on optic neuromyelitis optica spectrum disease with cortical leptomeningeal enhancement  DOI: 10.3760/cma.j.cn112137-20200623-01933 | 0 | / | 2 | / |
| Case 67: A case report on optic neuromyelitis optica spectrum disease with peripheral nerve damage  DOI: 10.3760/cma.j.issn.1006-7876.2016.12.014 | 1 | / | 1 | / |
| Case 68: Sinonasal disease related to IgG4: one case report  DOI: 10.3760/cma.j.issn.1673-0860.2017.10.013 | 0 | / | 2 | / |
| Case 69: Nasopharyngeal IgG4 related disease with fungal sinusitis of maxillary sinus: a case report  DOI: 10.3760/cma.j.issn.1673-0860.2019.08.013 | 1 | / | 3 | / |
| Case 70: A case report on IgG4-associated disease presenting as pleural effusion  DOI: 10.3760/cma.j.cn112137-20200705-02036 | 2 | / | 3 | / |
| Case 71: A case report on IgG4-associated disease presenting as an intravertebral space occupancy  DOI: 10.3760/cma.j.issn.1006-7876.2015.12.013 | 0 | / | 2 | / |
| Case 72: Two case report on spinal cord spondylosis with Charcot's arthropathy  DOI: 10.3760/cma.j.issn.1001-2346.2017.12.023 | 0 | / | 0 | / |
| Case 73: Neuromyelitis optica spectrum disorder associated with herpes zoster: a case report  DOI: 10.3760/cma.j.issn.1006-7876.2018.11.011 | 0 | / | 0 | / |
| Case 74: Noninvasive Fungal Sphenoid Sinusitis Complicated with Neuromyelitis Optical Spectrum Disorder: A Case Report  DOI: 10.3760/cma.j.cn115909-20191204-00322 | 3 | / | 3 | / |
| Case 75: A case report on IgG4-associated lung disease with purely pulmonary involvement  DOI: 10.3760/cma.j.issn.1001-0939.2014.09.021 | 0 | / | 1 | / |
| Case 76: Left isolated renal pelvic occupancy-IgG4-associated disease  DOI: 10.3760/cma.j.issn.0376-2491.2020.09.014 | 1 | / | 3 | / |
| Case 77: Joubert syndrome in a child with nephronophthisis  DOI: 10.3760/cma.j.issn.0578-1310.2018.05.015 | 3 | / | 3 | / |
| Case 78: A case report on lymphoproliferative disorder after parental liver transplantation in a child  DOI: 10.3760/cma.j.issn.1673-4912.2018.01.019 | 0 | / | 0 | / |
| Case 79: Childhood systemic Epstein-Barr virus positive T-cell lymphoproliferative disease: report of one case  DOI: 10.3760/cma.j.issn.1009-9921.2016.12.016 | 1 | / | 2 | / |
| Case 80: A case report on systemic lupus erythematosus combined with optic neuromyelitis optica spectrum disease in a child  DOI: 10.3760/cma.j.issn.1673-4408.2019.07.019 | 3 | / | 3 | / |
| Case 81: Hematologic malignancies combined with invasive fusariosis: a case report and literatures review  DOI: 10.3877/cma.j.issn.1673-5250.2018.04.006 | 0 | / | 0 | / |
| Case 82: Different forms of thyroid dysfunction in the same patient treated with interferon-α: One case report and literature review  DOI: 10.3760/cma.j.issn.1000-6699.2016.12.010 | 0 | 1 | 0 | 1 |
| Case 83: Atypical Takotsubo cardiomyopathy associated with neuromyelitis optica spectrum disorders: a case report  DOI: 10.3760/cma.j.cn113694-20200331-00231 | 0 | / | 1 | / |
| Case 84: Autoimmune nodopathy with anti-contactin 1 antibodies  DOI: 10.3760/cma.j.cmcr.2022.e01683 | 3 | / | 0 | / |
| Case 85: A case report on combined anti-N-methyl-D-aspartate receptor encephalitis overlap syndrome in a patient of disease associated with anti-myelin oligodendrocyte glycoprotein immunoglobulin G antibodies  DOI: 10.3760/cma.j.cn112137-20220701-01468 | 3 | / | 3 | / |
| Case 86: A case of overlapping syndrome both anti myelin oligodendrocyte glycoprotein immunoglobulin G antibody related disease and autoimmune glial fibrillary acidic protein astrocytosis  DOI: 10.3760/cma.j.cmcr.2022.e02297 | 0 | 0 | 0 | 0 |
| Case 87: Case report of IgG4-related disease involving multiple organs  DOI: 10.3760/cma.j.cmcr.2022.e03844 | 0 | 3/4 | 3 | 1/2 |
| Case 88: A case of IgG4-associated disease involving liver, lung, lymph nodes and blood vessels  DOI: 10.3760/cma.j.cmcr.2023.e00720 | 0 | / | 1 | / |
| Case 89: A case of IgG4-related disease involving systemic polyglandular and pulmonary involvement  DOI: 10.3760/cma.j.cmcr.2022.e03960 | 1 | / | 0 | / |
| Case 90: A case of IgG4-related disease involving systemic polyglandular and orbital involvement  DOI: 10.3760/cma.j.cmcr.2023.e00669 | 0 | / | 0 | / |
| Case 91: Newly diagnosed type 2 diabetes mellitus complicated with atherosclerotic cardiovascular disease treated by liraglutide: a case report  DOI: 10.3760/cma.j.cn115791-20221008-00568 | 3 | 1/2 | 3 | 1/2 |
| Case 92: B-cell expansion with nuclear factor-κB and T-cell anergy disease treated with rituximab in a child  DOI: 10.3760/cma.j.cn112140-20220814-00724 | 0 | / | 0 | / |
| Case 93: The clinical, pathology and imaging of fragile X-associated tremor/ataxia syndrome mimicking neuronal intranuclear inclusion disease: a case report  DOI: 10.3760/cma.j.cmcr.2022.e06545 | 0 | 0 | 1 | 0 |
| Case 94: Follicular dendritic cell sarcoma with IgG4-related disease:A case report  DOI: 10.3760/cma.j.cmcr.2022.e06797 | 3 | / | 0 | / |
| Case 95: Chronic natural killer lymphoproliferative disease involving lung and kidney: a case report  DOI: 10.3760/cma.j.cmcr.2023.e00107 | 0 | / | 0 | / |
| Case 96: A case report on chronic thromboembolic disease  DOI: 10.3760/cma.j.cn112147-20210521-00345 | 3 | 1 | 3 | 1 |
| Case 97: Chronic obstructive pulmonary disease: a case report  DOI: 10.3760/cma.j.cmcr.2023.e00412 | 3 | / | 3 | / |
| Case 98: Chronic obstructive pulmonary disease: a case report  DOI: 10.3760/cma.j.cmcr.2023.e00412 | 3 | 1/2 | 3 | 1/2 |
| Case 99: Chronic obstructive pulmonary disease complicated with inhaled corticosteroid-related tuberculosis: A case report  DOI: 10.3760/cma.j.cmcr.2022.e00694 | 0 | 3/4 | 0 | 3/4 |
| Case 100: Bronchial frozen lung biopsy in a case of propeptidase deficiency with interstitial lung disease in infants  DOI: 10.3760/cma.j.cmcr.2022.e00227 | 0 | / | 0 | / |
| Case 101: IgG4 related sclerosing disease of the maxillary sinus: a case report  DOI: 10.3760/cma.j.cmcr.2023.e00075 | 0 | / | 0 | / |
| Case 102: A case of post-transplant lymphoproliferative disorder after kidney transplantation  DOI: 10.3760/cma.j.cmcr.2023.e00526 | 3 | / | 2 | / |
| Case 103: Lymphoproliferative disease of central nervous system after kidney transplantation: a case report  DOI: 10.3760/cma.j.cmcr.2022.e02225 | 2 | / | 0 | / |
| Case 104: Neuromyelitis optica spectrum disorders complicated with immune thrombocytopenia: a case report  DOI: 10.3760/cma.j.cn113694-20201227-01008 | 0 | 1 | 0 | 1 |
| Case 105: Clinical analysis of a case with acute respiratory failure secondary to eosinophilic chronic obstructive pulmonary disease  DOI: 10.3760/cma.j.cmcr.2022.e00685 | 3 | / | 3 | / |
| Case 106: Combined central and peripheral demyelination after varicella-zoster virus infection: a case report  DOI: 10.3760/cma.j.cn113694-20220816-00622 | 2 | / | 0 | / |
| Case 107: Hydroa vacciniforme-like lymphoproliferative disorder: A case report  DOI: 10.3760/cma.j.cmcr.2022.e00731 | 0 | / | 0 | / |
| Case 108: Semaglutide injection combined with other hypoglycemic drugs in the treatment of type 2 diabetes mellitus complicated with cardiovascular disease risk factors: a case report  DOI: 10.3760/cma.j.cn115791-20221008-00562 | 3 | 1 | 3 | 0 |
| Case 109: Semaglutide in the treatment of type 2 diabetes mellitus with atherosclerotic cardiovascular disease:a case report  DOI: 10.3760/cma.j.cn115791-20221008-00512 | 3 | 0 | 3 | 0 |
| Case 110: Patients with type 2 diabetes mellitus and arteriosclerotic cardiovascular disease treated by semaglutide: a case report  DOI: 10.3760/cma.j.cn115791-20221008-00553 | 0 | 1 | 0 | 1 |
| Case 111: Semaglutide in the treatment of type 2 diabetes mellitus complicated with atherosclerotic cardiovascular disease: a case report  DOI: 10.3760/cma.j.cn115791-20221008-00585 | 0 | 1/3 | 0 | 1 |
| Case 112: Semaglutide in the treatment of type 2 diabetes complicated with multiple cardiovascular diseases: a case report  DOI: 10.3760/cma.j.cmcr.2022.e06550 | 3 | 1/3 | 3 | 2/3 |
| Case 113: A case report of a patient with myelin oligodendrocyte glycoprotein antibody-associated disease  DOI: 10.3760/cma.j.cmcr.2022.e06265 | 0 | / | 0 | / |
| Case 114: Tofacitinib as successful maintenance therapy in IgG4-related disease: a case report  DOI: 10.3760/cma.j.cmcr.2022.e06411 | 3 | / | 2 | / |
| Case 115: A case report on gastrointestinal inert T-cell lymphoid tissue proliferative disorder  DOI: 10.3760/cma.j.cn311367-20210915-00502 | 0 | / | 0 | / |
| Case 116: A case report on misdiagnosis of IgG4-related disease as intracranial infection  DOI: 10.3760/cma.j.cn311365-20210428-00155 | 3 | / | 3 | / |
| Case 117: A case report on primary neurological lymphoma misdiagnosed as optic neuromyelitis optica spectrum disease  DOI: 10.3760/cma.j.cmcr.2022.e02977 | 0 | / | 0 | / |
| Case 118: IgG4-related disease as Pancreatic Carcinoma: A case report  DOI: 10.3760/cma.j.cmcr.2022.e06755 | 0 | / | 2 | / |
| Case 119: A case of neuromyelitis optic spectrum disorders that failed to be treated with low-dose rituximab  DOI: 10.3760/cma.j.cmcr.2022.e01811 | 0 | / | 3 | / |
| Case 120: Interstitial lung disease in a child with SFTPC gene mutation  DOI: 10.3760/cma.j.cmcr.2022.e01284 | 1 | / | 1 | / |
| Case 121: A case report on IgG4-associated disease with thrombocytopenia first  DOI: 10.13507/j.issn.1674-3474.2018.09.026 | 3 | / | 0 | / |
| Case 122: A case of IgG4-related disease in parapharyngeal space complicated with deep cervical infection  DOI: 10.3760/cma.j.cmcr.2022.e06829 | 2 | / | 0 | / |
| Case 123: Type 2 diabetic patient complicated with atherosclerotic cardiovascular disease converted to semaglutide after intensive insulin therapy: a case report  DOI: 10.3760/cma.j.cn115791-20221008-00528 | 3 | 4/5 | 3 | 1 |
| Case 124: Central nervous system post-transplant lymphoproliferative disorder: a case report  DOI: 10.3760/cma.j.cn113694-20220928-00729 | 0 | / | 2 | / |
| Case 125: Hereditary hemochromatosis type 4 and iron overload-associated liver diseases  DOI: 10.3760/cma.j.cmcr.2022.e01112 | 2 | / | 2 | / |
| Case 126: A case of MOGAD with epilepsy as the first symptom  DOI: 10.3760/cma.j.cmcr.2022.e06597 | 0 | / | 1 | / |
| Case 127: RHOBTB2 gene variation in a child with developmental and epileptic encephalopathy  DOI: 10.3760/cma.j.cn112140-20211110-00940 | 2 | 1 | 0 | 1 |
| Case 128: A case report of RYR1-related disorder presenting as periodic paralysis  DOI: 10.3760/cma.j.cmcr.2022.e06988 | 0 | / | 0 | / |
| Case 129: A case report of IgG4 related disease with pulmonary symptoms as the first presentation  DOI: 10.3760/cma.j.cmcr.2022.e07236 | 1 | 1 | 0 | 1 |
| Case 130: A case report of neuromyelitis optica spectrum disease with Sjögren syndrome represented by the area postrema syndrome  DOI: 10.3760/cma.j.cmcr.2022.e06918 | 0 | 0 | 0 | 0 |
| Case 131: A case report on a late-onset combined type of methylmalonic acidemia with interstitial lung disease and pulmonary hypertension as the first manifestation  DOI: 10.3760/cma.j.cn112137-20220302-00444 | 0 | 0 | 0 | 0 |
| Case 132: A case of MOG-IgG associated disorders  DOI: 10.3760/cma.j.cmcr.2022.e01251 | 0 | / | 0 | / |
| Case 133: Diabetes insipidus as the onset manifestation of IgG4-related disease: a case report  DOI: 10.3760/cma.j.cn112138-20210615-00422 | 0 | / | 0 | / |
| Case 134: IgG4 related disease presented as spleen mass:report of a case  DOI: 10.3760/cma.j.cn112151-20210226-00170 | 0 | / | 1 | / |
| Case 135: A case report of neuromyelitis optica spectrum disorder with somnolence  DOI: 10.3760/cma.j.cmcr.2022.e02526 | 0 | 1 | 0 | 1 |
| Case 136: IgG4-related disease with heart lesion as the main manifestation: 2 cases report  DOI: 10.3969/j.issn.1007-5410.2023.01.012 | 2 | / | 0 | / |
| Case 137: Pleural involvement in immunoglobulin G4-related disease: a case report  DOI: 10.3760/cma.j.cmcr.2022.e01791 | 2 | / | 0 | / |
| Case 138: Immunoglobulin IG4-related diseases with gingival hyperplasia: a case report  DOI: 10.3760/cma.j.cn112144-20211208-00541 | 0 | 1 | 3 | 1 |
| Case 139: One case with eosinophilic pulmonary diseases due to aspergillus infection  DOI: 10.3760/cma.j.cmcr.2022.e02883 | 0 | 1/2 | 3 | 1/2 |
| Case 140: A case of primary biliary cholangitis combined with IgG4 related diseases  DOI: 10.3760/cma.j.cmcr.2022.e06531 | 0 | 0 | 0 | 1 |
| Case 141: Long-term follow-up and individualized treatment of chronic obstructive pulmonary disease: A case report  DOI: 10.3760/cma.j.cmcr.2022.e00577 | 2 | 1 | 3 | 0 |
| Case 142: Correct use of inhalation device to reduce the risk of acute exacerbation of chronic obstructive pulmonary disease: A case report  DOI: 10.3760/cma.j.cmcr.2022.e01158 | 3 | / | 3 | / |
| Case 143: One case of IgG4-associated disease with middle ear onset  DOI: 10.3760/cma.j.cmcr.2022.e06386 | 3 | / | 0 | / |
| Case 144: Diagnosis and treatment of mass IgG4-related lung disease: A case report  DOI: 10.3760/cma.j.cmcr.2022.e03617 | 1 | / | 2 | / |
| Case 145: 18F-FDG PET/CT imaging and efficacy evaluation of hydroa vacciniforme-like lymphoproliferative disorder: a case report  DOI: 10.3760/cma.j.cn121381-202203038-00238 | 0 | / | 0 | / |
| Case 146: A case report on severe chronic obstructive pulmonary disease complicated by acute heart failure and invasive pulmonary aspergillosis  DOI: 10.3760/cma.j.cmcr.2022.e00641 | 0 | 1 | 0 | 1 |
| Case 147: Endometrium carcinoma complicated with lymphoproliferative disorder: a case report  DOI: 10.3760/cma.j.cmcr.2023.e01433 | 0 | / | 0 | / |
